# Supplementary material
Source: MDPI journal article supplement (https://www.mdpi.com/2504-3129/3/3/31)
Supplement: s1 [file s1]

# Supplementary Materials

**Table S1.** Detailed soil properties, gross and net N turnover rates, abundance of functional N genes, and production rates of greenhouse gases (GHG: N<sub>2</sub>O, CO<sub>2</sub>, CH<sub>4</sub>) and NO, HONO measured mainly in laboratory incubations of soil surface samples and in situ gas fluxes at two types of N availability hotspots: exemplified by a best described site of bare surfaces on permafrost peatland and thermokarst disturbed and revegetated retrogressive thaw slump (RTS), and undisturbed sites associated with the hotspots: vegetated surfaces on permafrost peatland and intact, fully vegetated soil adjacent to thaw slump, respectively. For RTS sites, a distinction was made between two subsites: slump floor (SF) and thaw mound (TM).

| Soil and Microbial Properties                                                                                     | Permafrost Peatland |                      | Mineral Upland Soils in Thermokarst Landscapes |                   |                                                 |
|-------------------------------------------------------------------------------------------------------------------|---------------------|----------------------|------------------------------------------------|-------------------|-------------------------------------------------|
|                                                                                                                   | Bare Surfaces *     | Vegetated Surfaces * | Disturbed, Revegetated RTS **                  |                   | Undisturbed Fully Vegetated Site Next to RTS ** |
|                                                                                                                   |                     |                      | Slump Floor (SF)                               | Thaw Mound (TM)   |                                                 |
| <b>pH</b>                                                                                                         | 3.3 [86]            | 3.4 [86]             | 8.2 ± 0.3 [87]                                 | 7.9 ± 0.0 [257]   | 5.7 ± 0.3 [87]                                  |
|                                                                                                                   | 4.0 ± 0.2 [248]     | 3.8 ± 0.0 [248]      | 6.1 ± 0.2 [257]                                |                   |                                                 |
| <b>C/N</b>                                                                                                        | 24 ± 2 [86]         | 62 ± 16 [86]         | 14.1 ± 1.1 [87]                                | 12.8 ± 0.1 [257]  | 38.0 ± 3.7 [87]                                 |
|                                                                                                                   | 19 ± 0 [248]        | 40 ± 4 [248]         | 15.3 ± 1.7 [257]                               |                   |                                                 |
| <b>WFPS (%)</b>                                                                                                   | 70 ± 3 [86]         | 27 ± 16 [86]         | 52 ± 9 [87]                                    | 60 ± 3 [257]      | 13 ± 6 [87]                                     |
|                                                                                                                   | 35 ± 3 [248]        | 17 ± 2 [248]         | 67 ± 3 [257]                                   |                   |                                                 |
| <b>SOM (%)</b>                                                                                                    | 95 ± 1 [86]         | 98 ± 0 [86]          | 8 ± 0 [87]                                     | 8 ± 0 [257]       | 27 ± 3 [87]                                     |
|                                                                                                                   | 94 ± 1 [248]        | 98 ± 0 [248]         | 13 ± 2 [257]                                   |                   |                                                 |
| <b>DOC</b> (µg g dw <sup>-1</sup> )<br>(µg C g dw <sup>-1</sup> )                                                 | 849 ± 234 [217]     | 613 ± 152 [217]      | 75 ± 18 [382]                                  | 226 ± 7 [382]     | n.d.                                            |
|                                                                                                                   | 1340 ± 107 [248]    | 1350 ± 61 [248]      |                                                |                   |                                                 |
| <b>TN (%)</b>                                                                                                     | 2.2 ± 0.3 [86]      | 0.8 ± 0.2 [86]       | 0.24 ± 0.03 [87]                               | 0.34 ± 0.01 [257] | 0.29 ± 0.03 [87]                                |
|                                                                                                                   | 2.6 ± 0.1 [248]     | 1.2 ± 0.1 [248]      | 0.43 ± 0.11 [257]                              |                   |                                                 |
| <b>δ<sup>15</sup>N in bulk soil (‰)</b>                                                                           | n.d.                | n.d.                 | 1.02 ± 0.13 [87]                               | 1.95 ± 0.08 [257] | 1.24 ± 0.25 [87]                                |
|                                                                                                                   |                     |                      | 1.76 ± 0.07 [257]                              |                   |                                                 |
| <b>Ammonium</b><br>(µg N g dw <sup>-1</sup> )                                                                     | 4.6 ± 3.3 [217]     | 0.9 ± 3.0 [217]      | 2.6 ± 0.8 [87]<br>0.1 ± 0.1 [257]              | 0.0 ± 0.0 [257]   | 9.0 ± 11.7 [87]                                 |
|                                                                                                                   | 25.0 ± 15.0 [86]    | 9.0 ± 3.0 [86]       |                                                |                   |                                                 |
|                                                                                                                   | 116.0 ± 39.0 [203]  | 35.0 ± 6.0 [203]     |                                                |                   |                                                 |
|                                                                                                                   | 94.0 ± 37.0 [248]   | 36.0 ± 8.0 [248]     |                                                |                   |                                                 |
|                                                                                                                   | 5.4 ± 0.6 [206]     | 0.0 ± 0.0 [206]      |                                                |                   |                                                 |
|                                                                                                                   | 62.6 ± 5.3 [256]    | 36.4 ± 7.1 [256]     |                                                |                   |                                                 |
| <b>Nitrat</b><br>(µg N g dw <sup>-1</sup> )                                                                       | 15.9 ± 11.9 [217]   | 0.08 ± 0.13 [217]    | 0.7 ± 0.3 [87]<br>0.6 ± 0.1 [257]              | 81.6 ± 24.3 [257] | 0.0 ± 0.0 [87]                                  |
|                                                                                                                   | 12.0 ± 6.0 [86]     | 4.0 ± 2.0 [86]       |                                                |                   |                                                 |
|                                                                                                                   | 60.0 ± 11.0 [203]   | 11.0 ± 4.0 [203]     |                                                |                   |                                                 |
|                                                                                                                   | 419.0 ± 54.0 [248]  | 3.2 ± 1.1 [248]      |                                                |                   |                                                 |
|                                                                                                                   | 15.0 ± 3.0 [206]    | 0.0 ± 0.0 [206]      |                                                |                   |                                                 |
|                                                                                                                   | 178.9 ± 7.3 [256]   | 7.9 ± 0.6 [256]      |                                                |                   |                                                 |
| <b>DOC/DIN</b><br>(mol mol <sup>-1</sup> )<br>(µg C g dw <sup>-1</sup> ) (µg N g dw <sup>-1</sup> ) <sup>-1</sup> | 42 [217]            | 636 [217]            | 123 [382]                                      | 3 [382]           |                                                 |
|                                                                                                                   | 3 [248]             | 34 [248]             |                                                |                   |                                                 |
| <b>DIN/TN (%)</b>                                                                                                 | 0.2 [86]            | 0.2 [86]             | 0.1 [87]                                       | 2.4 [257]         | 0.3 [87]                                        |
|                                                                                                                   | 2.0 [248]           | 0.3 [248]            | 0.02 [257]                                     |                   |                                                 |
| <b>Gross N mineralization</b><br>(mg N m <sup>-2</sup> d <sup>-1</sup> )                                          | 600 ± 400 [86]      | 100 ± 30 [86]        | n.d.                                           | n.d.              | n.d.                                            |
|                                                                                                                   | 270 ± 90 [203]      | 10 ± 10 [203]        |                                                |                   |                                                 |
| <b>Gross N mineralization</b><br>(µg N g dw <sup>-1</sup> d <sup>-1</sup> )                                       | 23.7 ± 6.2 [86]     | 16.6 ± 1.7 [86]      | 15.1 ± 10.1 [87]                               | n.d.              | b.d.                                            |
|                                                                                                                   | 9.9 ± 3.5 [203]     | 1.3 ± 1.0 [203]      |                                                |                   |                                                 |
| <b>Net N mineralization</b><br>(mg N m <sup>-2</sup> d <sup>-1</sup> )                                            | 18.5 ± 6 [217]      | 0.1 ± 0.1 [217]      | n.d.                                           | n.d.              | n.d.                                            |
|                                                                                                                   | 90 ± 50 [203]       | 1 ± 3 [203]          |                                                |                   |                                                 |
| <b>Net N mineralization</b>                                                                                       | n.d.                | n.d.                 | 7.4 ± 1.4 [87]                                 | 1.4 ± 0.5 [257]   | -20.9 ± 16.6 [87]                               |

|                                                                                                                                                    |                                                                                                      |                                                                                                         |                                                       |                            |                                        |
|----------------------------------------------------------------------------------------------------------------------------------------------------|------------------------------------------------------------------------------------------------------|---------------------------------------------------------------------------------------------------------|-------------------------------------------------------|----------------------------|----------------------------------------|
| ( $\mu\text{g N g dw}^{-1} \text{ d}^{-1}$ )<br>mean of p.a.s. 0.8°                                                                                |                                                                                                      |                                                                                                         | 0.5 ± 0.3 [257]                                       |                            |                                        |
| <b>Gross nitrification</b><br>( $\mu\text{g N g dw}^{-1} \text{ d}^{-1}$ )<br>mean of p.a.s. 6.6                                                   | 3.2 ± 1.9 [203]                                                                                      | 0.2 ± 0.1 [203]                                                                                         | b.d.                                                  | n.d.                       | b.d.                                   |
| <b>Net nitrification</b><br>(aerobic nitrate production)<br>( $\mu\text{g N g dw}^{-1} \text{ d}^{-1}$ )<br>mean of p.a.s. -0.4                    | n.d.                                                                                                 | n.d.                                                                                                    | 2.6 ± 0.2 [87] <sup>k</sup>                           | 1.4 ± 0.5 [257]            | -6.0 ± 2.9 [87]                        |
| <b>Net aerobic N<sub>2</sub>O production</b><br>(ng N g dw <sup>-1</sup> d <sup>-1</sup> )                                                         | n.d.                                                                                                 | n.d.                                                                                                    | 0.14 ± 0.01 [87]<br>0.42 ± 0.57 [382]                 | 0.06 ± 0.01 [382]          | 0.12 ± 0.05 [87]                       |
| <b>Net denitrification</b><br>(anaerobic N <sub>2</sub> O production with,<br>(without acetylene))<br>( $\mu\text{g N g dw}^{-1} \text{ d}^{-1}$ ) | 0.56 (0.37) [206]                                                                                    | <0.004 (b.d.) [206]                                                                                     | 2.8 ± 1.8 (0.6 ± 0.4) [87]<br>n.d. (0 ± 0) [257]      | n.d.<br>(0.2 ± 0.02) [257] | 0.01 ± 0.00 [87]<br>(0.01 ± 0.00) [87] |
| <b>Functional nitrification gene</b><br>AOA <i>amoA</i> (copies gdw <sup>-1</sup> )                                                                | 6.4 × 10 <sup>8</sup> [120]                                                                          | 8.0 × 10 <sup>6</sup> [120]                                                                             | 2.0 × 10 <sup>7</sup> [87]                            | n.d.                       | 5.4 × 10 <sup>7</sup> [87]             |
| AOB <i>amoA</i> (copies gdw <sup>-1</sup> )                                                                                                        | b.d.                                                                                                 | b.d.                                                                                                    | 3.3 × 10 <sup>7</sup> [87]                            | n.d.                       | 4.2 × 10 <sup>6</sup> [87]             |
| <b>Functional nitrification gene</b><br><i>amoA</i> (% of 16S rRNA)                                                                                | n.d.                                                                                                 | n.d.                                                                                                    | 7 [87]                                                | n.d.                       | 1 [87]                                 |
| <i>amoA</i> (% of N genes)                                                                                                                         | n.d.                                                                                                 | n.d.                                                                                                    | 3.4 ± 1.0 [87]                                        | n.d.                       | 0.5 ± 1.0 [87]                         |
| <b>Functional denitrification gene</b><br>(% and %/ of 16S rRNA) [206] and<br>(% and %/ of N genes) [87]                                           |                                                                                                      |                                                                                                         |                                                       |                            |                                        |
| <i>narG</i>                                                                                                                                        | 7.6 ± 2.8 [206]                                                                                      | 0.04 ± 0.01 [206]                                                                                       | 42 ± 0.9 [87]                                         | n.d.                       | 45 ± 9.3 [87]                          |
| <i>nirS</i> + <i>nirK</i>                                                                                                                          | 0.34 ± 0.08 [206]                                                                                    | 0.88 ± 0.13 [206]                                                                                       | 29 ± 0.1 [87]                                         | n.d.                       | 15 ± 0.6 [87]                          |
| ( <i>nirS</i> + <i>nirK</i> )/ <i>nosZ</i>                                                                                                         | 0.20 × 10 <sup>3</sup> [206]                                                                         | 0.88 × 10 <sup>3</sup> [206]                                                                            | 2.4 ± 0.2 [87]                                        | n.d.                       | 0.5 ± 0.1 [87]                         |
| <b>N<sub>2</sub>O fluxes</b><br>(mg N m <sup>-2</sup> d <sup>-1</sup> )                                                                            | 6.55 ± 2.83 [86]<br>2.04 ± 1.15 [203]<br>0.29 ± 0.07 [248]<br>1.01 ± 0.43 [120]<br>0.01 ± 0.00 [256] | 0.03 ± 0.04 [86]<br>-0.01 ± 0.00 [203]<br><0.08 ± 0.03 [248]<br>0.03 ± 0.03 [120]<br>-0.06 ± 0.01 [256] | 1.64 ± 2.61 [87]                                      | n.d.                       | -0.001 ± 0.018 [87]                    |
| <b>NO fluxes</b><br>(mg N m <sup>-2</sup> d <sup>-1</sup> )                                                                                        | 1.42 ± 0.13 [256]                                                                                    | 0.006 ± 0.002 [256]                                                                                     | n.d.                                                  | n.d.                       | n.d.                                   |
| <b>HONO fluxes</b><br>(mg N m <sup>-2</sup> d <sup>-1</sup> )                                                                                      | 0.06 ± 0.02 [256]                                                                                    | b.d. [256]                                                                                              | n.d.                                                  | n.d.                       | n.d.                                   |
| <b>CO<sub>2</sub> fluxes (soil respiration)</b><br>(g C m <sup>-2</sup> d <sup>-1</sup> )                                                          | 1.51 ± 0.66 [245]<br>0.99 ± 0.09 [248]                                                               | 1.18 ± 0.07 [245]<br>2.16 ± 0.27 [248]                                                                  | 2.28 ± 0.78 [258]                                     | n.d.                       | 0.34 ± 0.18 [258]                      |
| <b>Aerobic CO<sub>2</sub> production</b><br>( $\mu\text{g C g dw}^{-1} \text{ d}^{-1}$ )                                                           | 27.0 [245]                                                                                           | 91.6 [245]                                                                                              | 0.8 ± 0.5 [383]<br>6.1 ± 0.6 [257]<br>2.3 ± 1.5 [258] | 1.8 ± 0.9 [257]            | 6.3 ± 2.4 [383]<br>7.5 ± 1.7 [258]     |
| <b>CH<sub>4</sub> fluxes</b><br>(mg C m <sup>-2</sup> d <sup>-1</sup> )                                                                            | 160 ± 5 [248]<br>1.36 ± 2.19 [252]                                                                   | <90 ± 3 [248]<br>0.37 ± 0.35 [252]                                                                      | -0.05 ± 0.05 [87]                                     | n.d.                       | -0.19 ± 0.05 [87]                      |
| <b>Anaerobic CH<sub>4</sub> production</b><br>(ng C g dw <sup>-1</sup> d <sup>-1</sup> )                                                           | n.d.                                                                                                 | n.d.                                                                                                    | 0.02 ± 0.06 [383]<br>14.9 ± 13.8 [257]                | 7.8 ± 11.0 [257]           | 0.00 ± 0.00 [383]                      |

\* Peat plateau in Seida, Komi Republic, Russia N 67°03', E 62°57' (Figures 1 and 2), bare peat surfaces covered by a thin layer of moss but without vascular plants, vegetated site with typical bog vegetation [86]. \*\* Retrogressive thaw slump, Kurungnakh Island, Lena Delta, Russia, N 72°20', E 126°17' (Figures 1 and 2), undisturbed site: Holocene cover deposits vegetated with moss, sedge and dwarf shrub communities on the top of the RTS, disturbed thermokarst site: Yedoma revegetated with grasses (*Arctagrostis arundinacea*) subdivided slump floor (SF, SF3V in [257]; SF3 in [257,258], Yedoma mixed with younger Holocene and thaw mounds (TM, TM1V in [257] dominating by late Pleistocene Yedoma as described in Marushchak et al. [87]. Ref. [86] soil samples from 0–10 cm depth were collected once per month in June–August 2008 and N mineralization rates were measured in oxic incubations at 15 °C for 24 h, N<sub>2</sub>O fluxes were measured weekly in situ between May/June until October. Ref. [87] soil samples were collected in July 2016 at a depth of 0–

10 cm, CH<sub>4</sub> and N<sub>2</sub>O fluxes were measured in situ twice in July 2016, N turnover rates were estimated in soil incubations using the <sup>15</sup>N dilution technique at 5 °C for 24 h. N<sub>2</sub>O production due to nitrification were measured under oxic and due to denitrification under anoxic conditions with or without addition of acetylene at 10 °C for 6 days. Ref. [120] soil samples were collected from June to August 2011 from a depth of up to 10 cm; N<sub>2</sub>O fluxes were measured on one day, and nitrification was measured in incubations at 13 °C for 30 days. Ref. [217] soil samples collected from 0–5 cm depth in July 2011, N mineralization rates measured in situ using buried bag technique at field temperature for 25 days. Ref. [206] soil parameters were measured in September 2010 from a depth of 0–5 cm, denitrification rates were measured in anoxic incubation at 20 °C for 160 days. Ref. [203] N<sub>2</sub>O fluxes, N mineralization and nitrification rates measured by <sup>15</sup>DIN labeling experiments in situ from July to August in 2010 at field temperature for 24 days, with N<sub>2</sub>O fluxes measured before labeling. Ref. [245] soil samples for incubations were collected in August 2007 from a depth of 0–10 cm, CO<sub>2</sub> fluxes are soil respiration rates measured in situ, and CO<sub>2</sub> production was measured in soil incubations at 15 °C for one month. Ref. [248] soil parameters were measured from a depth of 0–5 cm in July 2012 and 2013, CO<sub>2</sub> fluxes were measured as average soil microbial respiration in situ in summer 2013, N<sub>2</sub>O fluxes during the growing season from June to September in 2012 and 2013, for vegetated sites only data for warmed sites were available, but they showed that not warmed N<sub>2</sub>O fluxes are smaller. Ref. [252] CH<sub>4</sub> fluxes measured in situ in the period July–October 2007 and May–October 2008. Ref. [256] N fluxes were measured in the laboratory at 21 °C on soil cores taken to a depth of 10 cm in August 2016. Ref. [257] soil samples were collected in July, 2019 at a depth of 0–20 cm, aerobic CO<sub>2</sub>, N<sub>2</sub>O and anaerobic CH<sub>4</sub> and N<sub>2</sub>O production rates were measured in incubations at temperature of 4 °C for 28 days, N turnover rates in slurry incubations at 4 °C for 40 days, SOM calculated from TC. Ref. [383] Unpublished data from M. E. Marushchak et al. measured in the same oxic and anoxic incubations as described for N<sub>2</sub>O [87]. Ref. [258] CO<sub>2</sub>-fluxes measured as soil respiration in situ in July 2017, CO<sub>2</sub> production was measured in incubations of soil samples from 0–10 cm at 4 °C for 175 days. Ref. [382] Unpublished data from R. Wegner et al. measured oxic incubations for as described in [257] data are means ± standard division from cited publications, therefore mainly site variations, all gas fluxes were measured with static chamber technique. *amoA* = gene of subunit A of ammonia monooxygenase, AOA = ammonia-oxidizing archaea, AOB = ammonia-oxidizing bacteria, b.d. = below detection limit, DIN = dissolved inorganic nitrogen, DOC = dissolved organic carbon, dw = dry weight, *narG* = gene of nitrate reductase, n.d. = not determined, *nirS*, *nirK* = genes of nitrite reductases, *nosZ* = gene of N<sub>2</sub>O reductase, p.a.s. = mean rates of permafrost-affected soils from Ramm et al. [59], SOM = soil organic matter, TN = total nitrogen, WFPS = water-filled pore space.

**Table S2.** Biochemical traits of hotspots with high N availability and adjacent control sites with N limitation using the example of a study site: water-filled pore space (WFPS), C/N ratio, dissolved inorganic nitrogen (DIN, ammonium + nitrate) and nitrate, microbial net N turnover: N mineralization, nitrification, denitrification, and abundance of genes of key functional enzymes of nitrification (*amo*, ammonia monooxygenase), denitrification (*nirS* + *nirK*, nitrite reductases) and (*nirS* + *nirK*)/*nosZ* ratio (nitrite reductase/N<sub>2</sub>O reductase) in subarctic bare (BP) and vegetated peatland (VP), Arctic retrogressive thaw slump (RTS) and undisturbed site (URTS), thermoerosion-gully (TEG) and undisturbed site (UTRG) on the Tibet Plateau, Arctic bare alluvial soils (AS) and vegetated floodplain (VP) and animal-influenced permafrost affected soils of the Arctic (AIA) and Antarctic (AIAA) and non-influenced soils of Arctic (NIA) and Antarctic (NIAA).

| Soil and Microbial Properties                                                                                               | Subarctic Bare Peat (BP)<br>Vegetated Peat (VP)  | Arctic Retrogressive Thaw Slump (RTS)<br>Undisturbed Site (URTS) | Thermo-Erosion Gully (TEG) of Tibet Plateau<br>Undisturbed Site (UTRG) | Arctic Alluvial Soil (AS)<br>Vegetated Floodplain (VP) | Arctic Animal Influenced Soil (AIA)<br>Non-Influenced (NAIA) | Antarctic Animal Influenced Soil (AIAA)<br>Non-Influenced (NAIAA) |
|-----------------------------------------------------------------------------------------------------------------------------|--------------------------------------------------|------------------------------------------------------------------|------------------------------------------------------------------------|--------------------------------------------------------|--------------------------------------------------------------|-------------------------------------------------------------------|
| N Hotspot Site                                                                                                              |                                                  |                                                                  |                                                                        |                                                        |                                                              |                                                                   |
| N Limitation Site                                                                                                           |                                                  |                                                                  |                                                                        |                                                        |                                                              |                                                                   |
| WFPS (%)                                                                                                                    | 53 ± 25<br>22 ± 7                                | 60 ± 8<br>13 ± 6                                                 | n.d.<br><i>n.d.</i>                                                    | n.d.<br><i>n.d.</i>                                    | n.d.<br><i>n.d.</i>                                          | 85 ± 2<br>25 ± 1                                                  |
| C/N                                                                                                                         | 22 ± 4<br>51 ± 16                                | 14 ± 1<br>38 ± 4                                                 | n.d.<br><i>n.d.</i>                                                    | 15<br>14                                               | n.d.<br><i>n.d.</i>                                          | 7 ± 1<br>12 ± 2                                                   |
| DIN<br>(µg N g dw <sup>-1</sup> )                                                                                           | 177 ± 14<br>24 ± 8                               | 29 ± 46<br>9 ± 12                                                | n.d.<br><i>n.d.</i>                                                    | 91 ± 57<br>0.3 ± 0.4                                   | 2276 ± 1380<br>0.6 ± 0.3                                     | 146 ± 49<br>1.7 ± 0.1                                             |
| DIN/TN<br>(%)                                                                                                               | 1.1 ± 1.3<br>0.3 ± 0.1                           | 0.9 ± 1.4<br>0.3                                                 | n.d.<br><i>n.d.</i>                                                    | 4.6 ± 2.9<br>0.0 ± 0.0                                 | 8.2<br>0.0                                                   | 0.7 ± 0.3<br>0.2 ± 0.0                                            |
| Nitrat<br>(µg N g dw <sup>-1</sup> )                                                                                        | 116.8 ± 2.8<br>4.4 ± 7.7                         | 27.6 ± 46.7<br>0.0 ± 0.0                                         | 4.5 ± 0.4<br>1.8 ± 0.0                                                 | 89.0 ± 56.7<br>0.0 ± 0.0                               | 2270.0 ± 1380.0<br>0.3 ± 0.3                                 | 90.2 ± 49.2<br>0.5 ± 0.0                                          |
| Net N-mineralization<br>(µg N g dw <sup>-1</sup> d <sup>-1</sup> )                                                          | n.d.<br><i>n.d.</i>                              | 3.10 ± 3.75<br>-20.90 ± 16.60                                    | n.d.<br><i>n.d.</i>                                                    | 1.70<br>0.10                                           | n.d.<br><i>n.d.</i>                                          | n.d.<br><i>n.d.</i>                                               |
| Net nitrification<br>(µg N g dw <sup>-1</sup> d <sup>-1</sup> )                                                             | n.d.<br><i>n.d.</i>                              | 1.47 ± 1.10<br>-6.00 ± 2.90                                      | n.d.<br><i>n.d.</i>                                                    | 13.00 ± 0.31<br>4.99 ± 0.07                            | n.d.<br><i>n.d.</i>                                          | 1.28 ± 0.26<br>0.33 ± 0.04                                        |
| Net denitrification<br>(anoxic N <sub>2</sub> O production with acetylene)<br>(µg N g dw <sup>-1</sup> d <sup>-1</sup> )    | 0.56<br>0.00                                     | 2.80 ± 1.80<br>0.01 ± 0.00                                       | n.d.<br><i>n.d.</i>                                                    | n.d.<br><i>n.d.</i>                                    | 96.0 ± 24.0<br>0.0 ± 0.0                                     | 3.70 ± 2.80<br>0.21 ± 0.04                                        |
| Functional nitrification gene <i>amoA</i><br>(% of 16S rRNA)                                                                | n.d.<br><i>n.d.</i>                              | 7.00<br>1.00                                                     | n.d.<br><i>n.d.</i>                                                    | 4.77<br>0.66                                           | n.d.<br><i>n.d.</i>                                          | 8.68 ± 7.85<br>7.33 ± 6.70                                        |
| Functional denitrification gene <i>nirS+nirK</i><br>(% of 16S rRNA, *of N genes or **log <sub>10</sub> g dw <sup>-1</sup> ) | 0.34 ± 0.08<br>0.88 ± 0.13                       | 29.0 ± 0.1 *<br>15.0 ± 0.6 *                                     | 4.14 ± 0.04 **<br>3.94 ± 0.04 **                                       | n.d.<br><i>n.d.</i>                                    | 9.29 ± 8.90 **<br>0.00 ± 0.00 **                             | 7.08 ± 7.00 **<br>3.82 ± 3.69 **                                  |
| ( <i>nirS+nirK</i> )/ <i>nosZ</i><br>(%/ of 16S rRNA, *N genes)                                                             | 0.20 × 10 <sup>3</sup><br>0.88 × 10 <sup>3</sup> | 2.4 ± 0.2 *<br>0.5 ± 0.1 *                                       | 6.05 ± 1.11<br>3.00 ± 1.05                                             | n.d.<br><i>n.d.</i>                                    | 3.09<br>0.00                                                 | n.d.<br><i>n.d.</i>                                               |
| N <sub>2</sub> O fluxes<br>(mg N m <sup>-2</sup> d <sup>-1</sup> )                                                          | 1.98 ± 3.19<br>0.01 ± 0.03                       | 1.64 ± 2.61<br>0.00 ± 0.02                                       | 1.97 ± 0.32<br>0.02 ± 0.00                                             | n.d.<br><i>n.d.</i>                                    | 0.40 ± 0.24<br>0.00 ± 0.00                                   | 0.38 ± 1.15<br>0.02 ± 0.00                                        |
| References                                                                                                                  | See Table 1                                      | See Table A1                                                     | [219]                                                                  | [119,303,305]                                          | [235]                                                        | [189,190,237]                                                     |

Description of sites and measurements: subarctic peatland site in Table 1; Arctic retrogressive thaw slump in Table A1; thermo-erosion-gully on northeastern Tibetan Plateau, China, N 37°28', E 100°17' at ~3900 m a.s.l. in the discontinuous permafrost zone, soil samples collected from a depth

of 0–15 cm in summer 2015, data are from the early stage, 3 years after collapse and control site. N<sub>2</sub>O was measured in situ in summer 2015/2016; Arctic non-vegetated alluvial and vegetated floodplain soils from Samoylov Island, Lena Delta Russia, N 72°22', E 126°28', collected in late August 2008 from a depth of 0–5 cm for DIN, net N mineralization and net nitrification were measured in incubations with Lena River water from samples in July 2019 from a depth of 25–35 cm for 14 days at 20–25 °C and in July 2008 from a depth of 0–5 cm for 6 weeks at ~5 °C; Arctic animal-influenced soils from Ny-Ålesund, Svalbard, Norway collected below seabird colonies (*Rissa tridactyla*, *Fulmarus glacialis*), data from sites BL-T-M and BL-C (N 78°59', E 12°06') from a depth of 0–5 cm were collected in July 2015, denitrification rates were measured in incubations at 10 °C for 6 h, and in situ N<sub>2</sub>O measurements; Antarctic animal-influenced soils from on Ardley Island on the Fildes Peninsula (S 61°51'–62°15', W 57°30'–59°00') collected from penguin colonies (*Pygoscelis adeliae*, *P. papua*, *P. antarcticus*) from a depth of 0–15 cm in summer 2014/2015, potential nitrification rates were estimated in incubations with 1 mM ammonium at 15 °C for 24 h, denitrification rates were measured in slurries labeled with <sup>15</sup>N-nitrate labeling at 10 °C for 8 h, and in situ N<sub>2</sub>O measurements. data are means ± standard division from cited publications, therefore mainly site variations, all gas fluxes were measured with static chamber technique. *amoA* = gene of subunit A of ammonia monooxygenase, DIN = dissolved inorganic nitrogen, dw = dry weight, n.d. = not determined, *nirS*, *nirK* = genes of nitrite reductases, *nosZ* = gene of N<sub>2</sub>O reductase, WFPS = water-filled pore space.
